# Supplementary material
Source: PubMed Central journal article supplement (PMC5117923)
Supplement: ejhg2016120x1.pdf [file ejhg2016120x1.pdf]

## Supplementary Figures

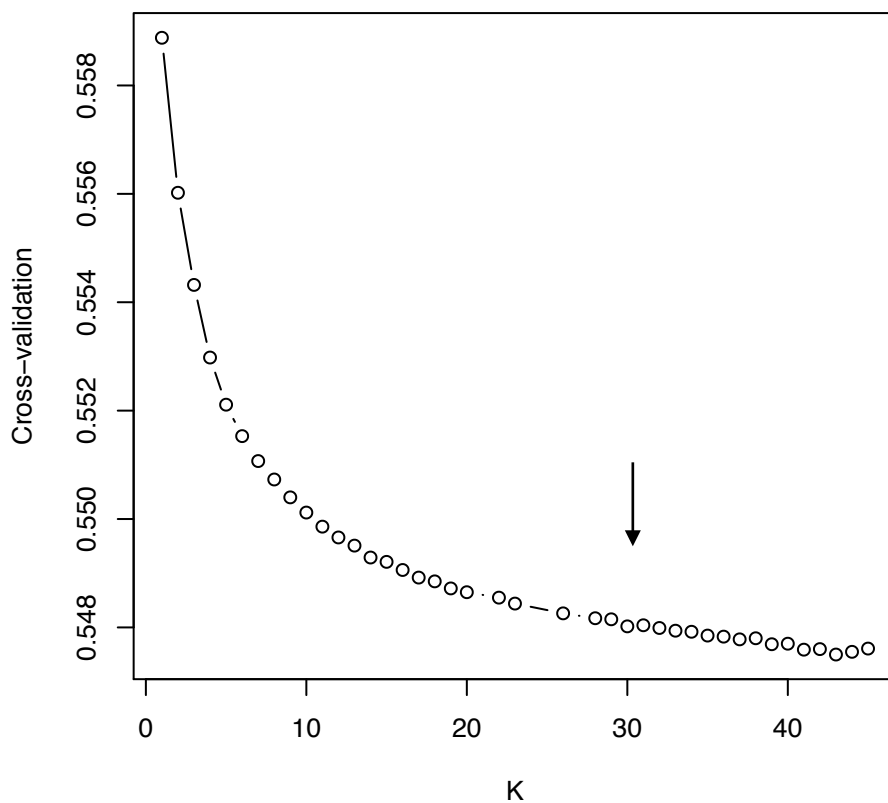

**Figure S1:** Cross-validation scores for each value of K. The arrow points to the selected value of 30.

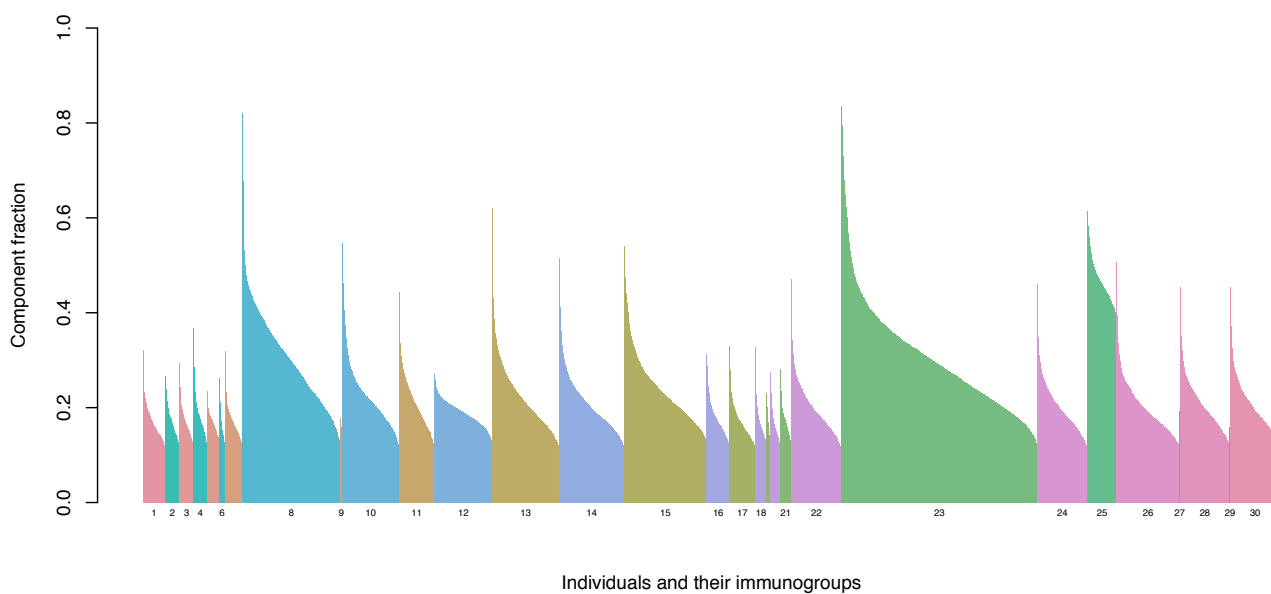

**Figure S2:** Assignment of each individual to an immunogroup. Based upon his/her predominant immunoancestry when  $K=30$ .

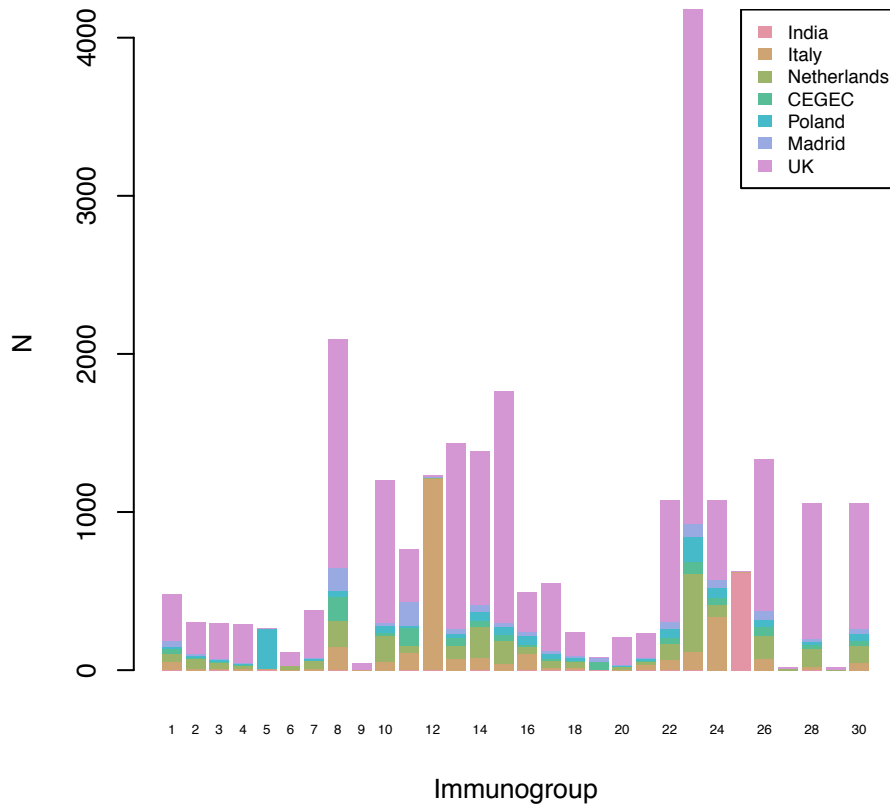

**Figure S3:** Distribution of the geographical origins of samples in each immunogroup.

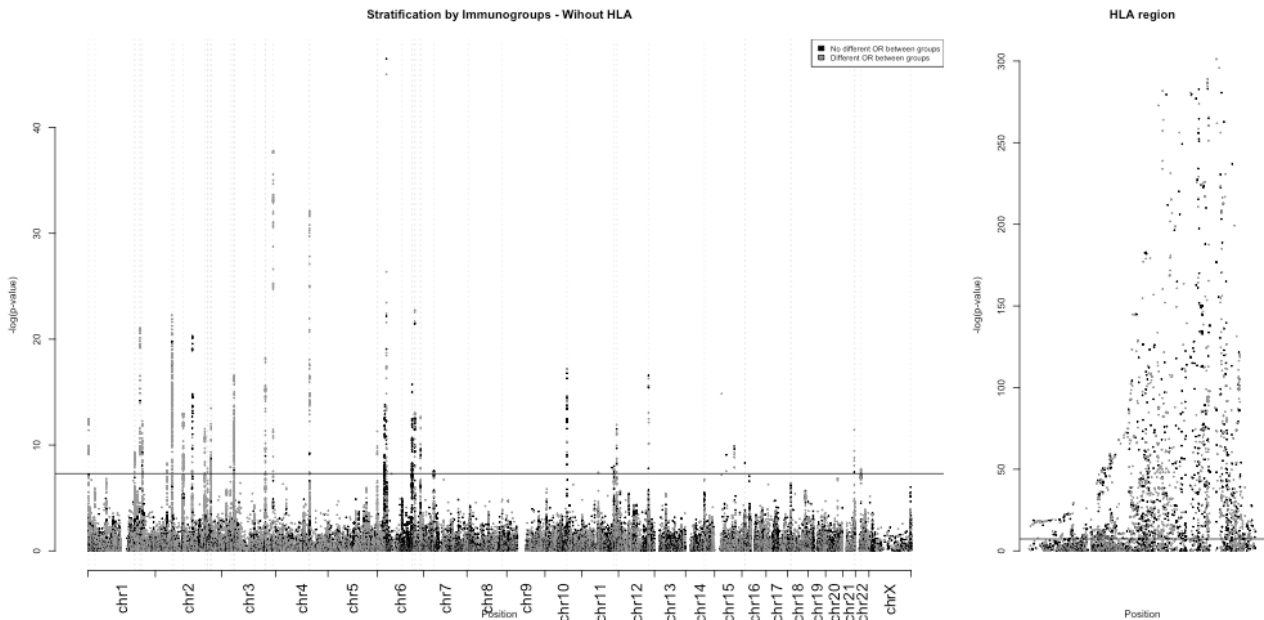

**Figure S4:** Manhattan-plot of association-analysis corrected by stratification of immunogroups. Vertical black line, significance cut-off used in our study; gray horizontal lines, previously described regions.

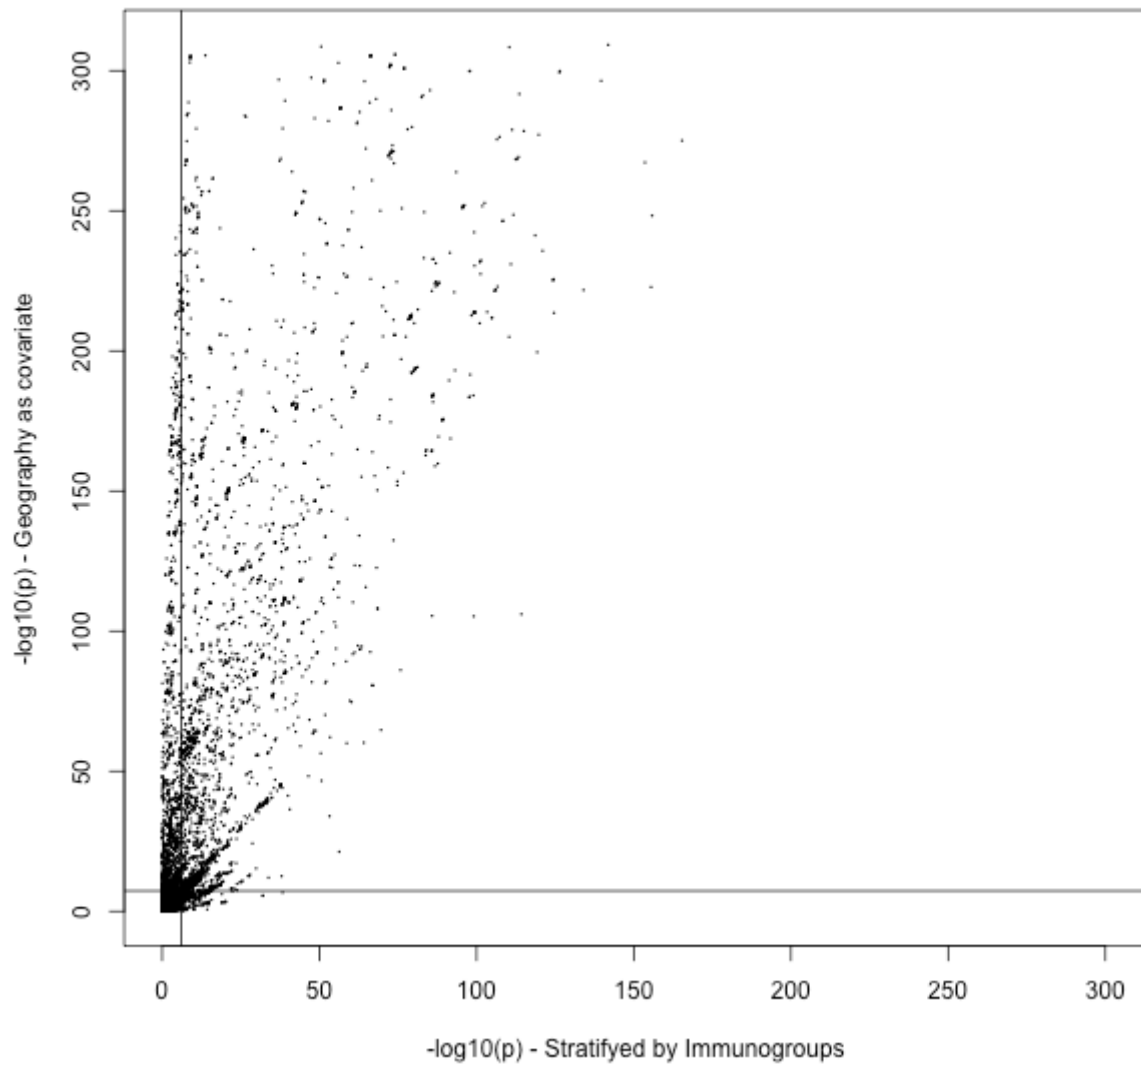

**Figure S5:** Comparison of results from original analysis of the ImmunoChip and the present study. Horizontal line, significance cut-off used in the original ImmunoChip analysis. Vertical line, significance cut-off used in our study.

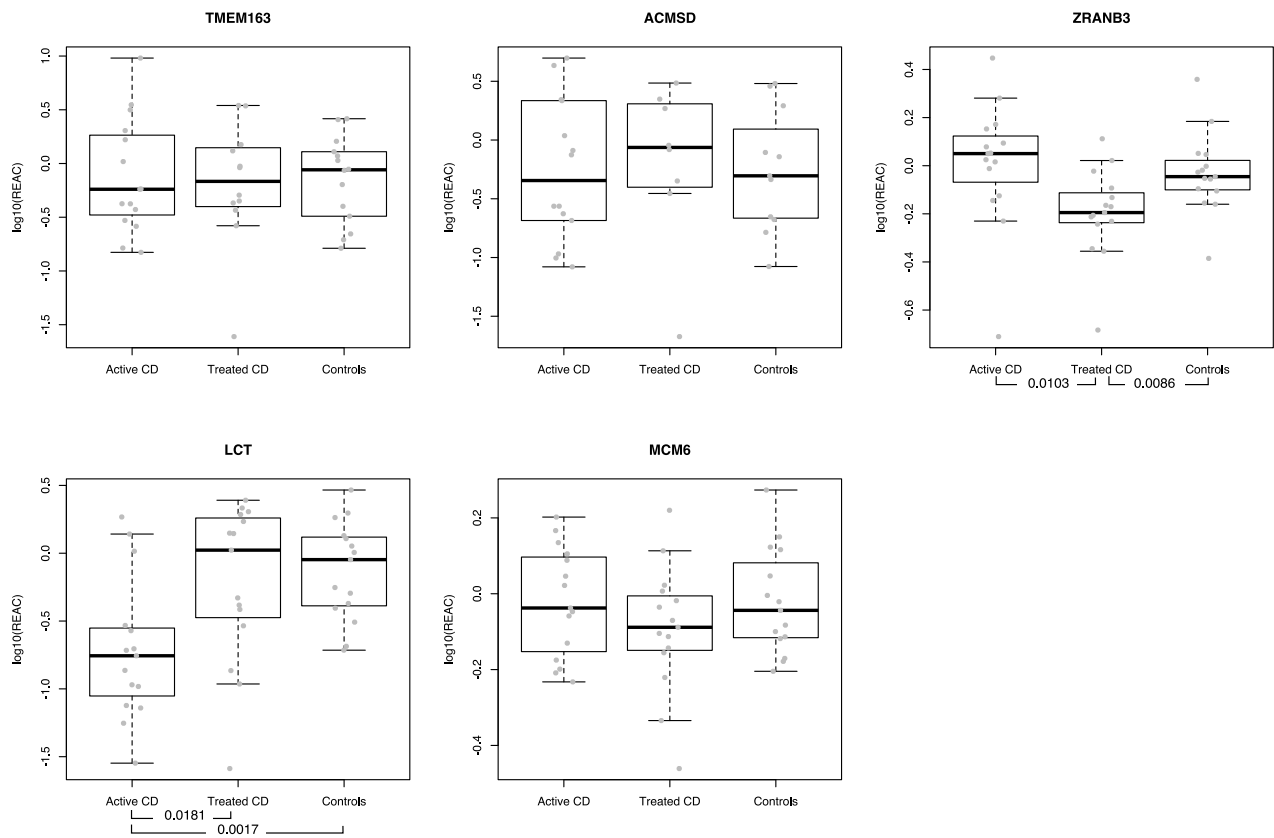

**Figure S6:** Expression analysis of the rest of genes from the region chr2:134533564-136169524. REAC, relative expression to average of controls; below each gene the significance of Mann-Whitney test for each comparison.

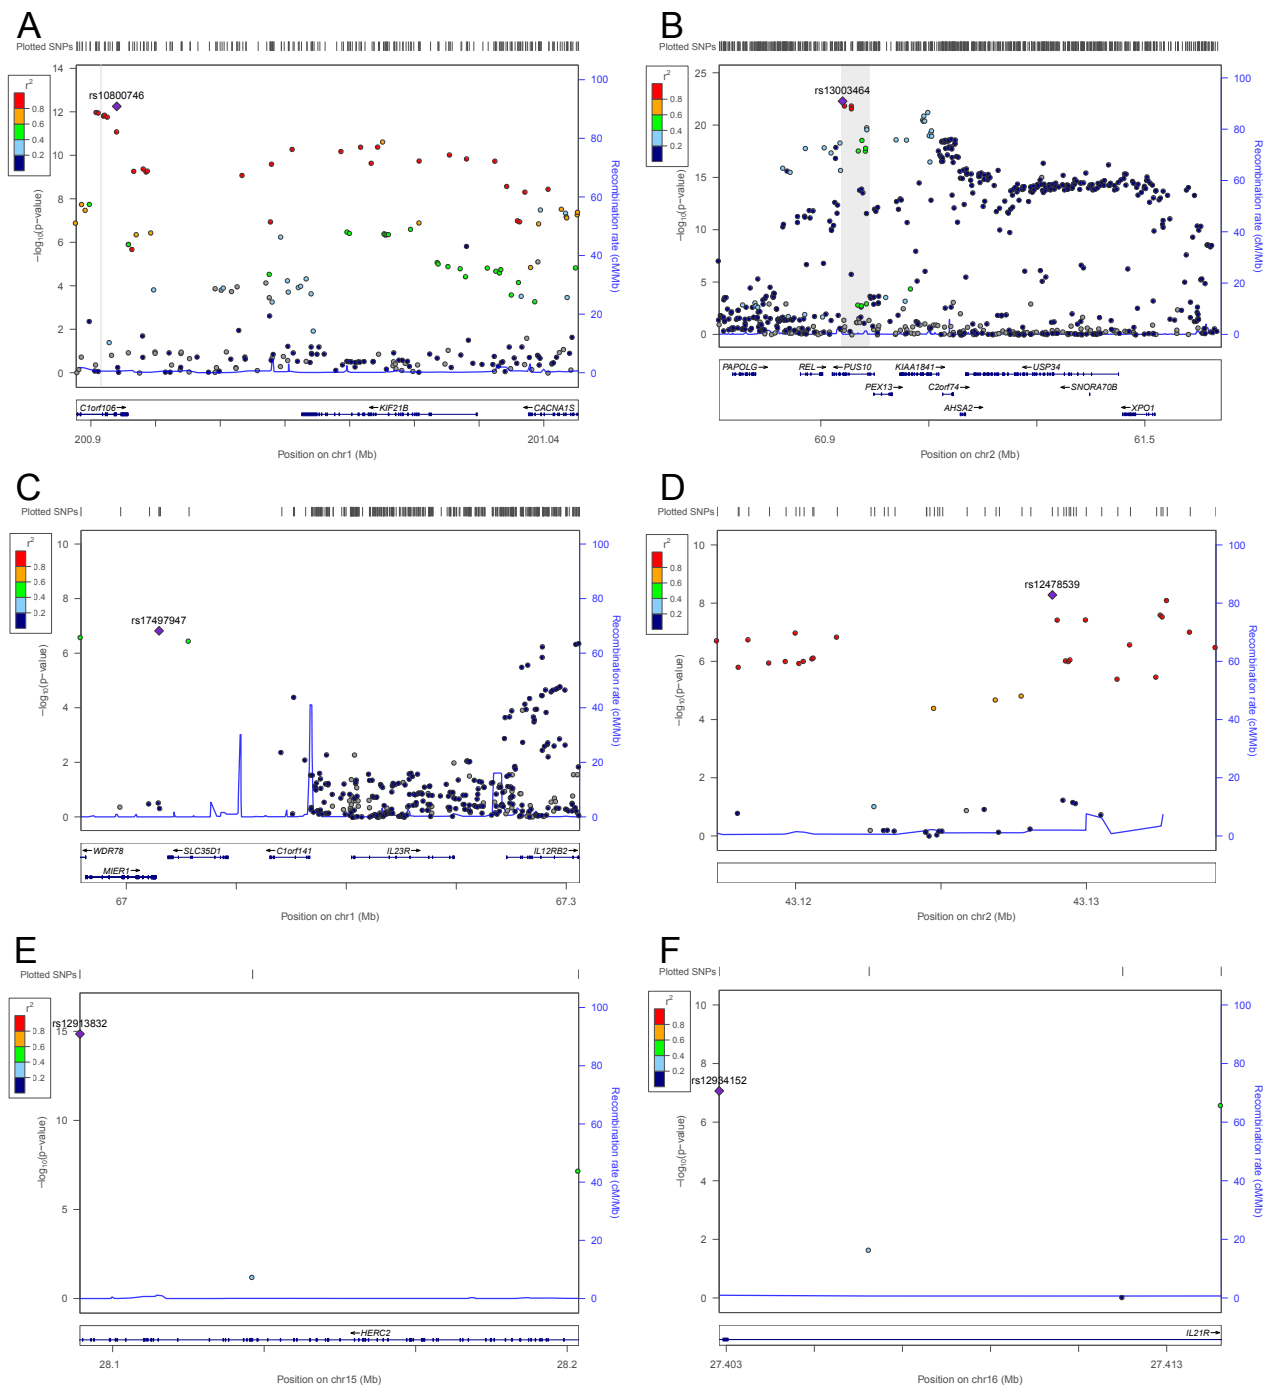

**Figure S7:** Representation of the rest relevant regions using Locuszoom. In gray previously described regions.

A, chr1:200899734-201054931; B, chr2:60731152-61660852; C, chr1:66920521-67373890; D, chr2:43116667-43133808; E, chr15:28120472-28285036; F, chr16:27403018-27414415.

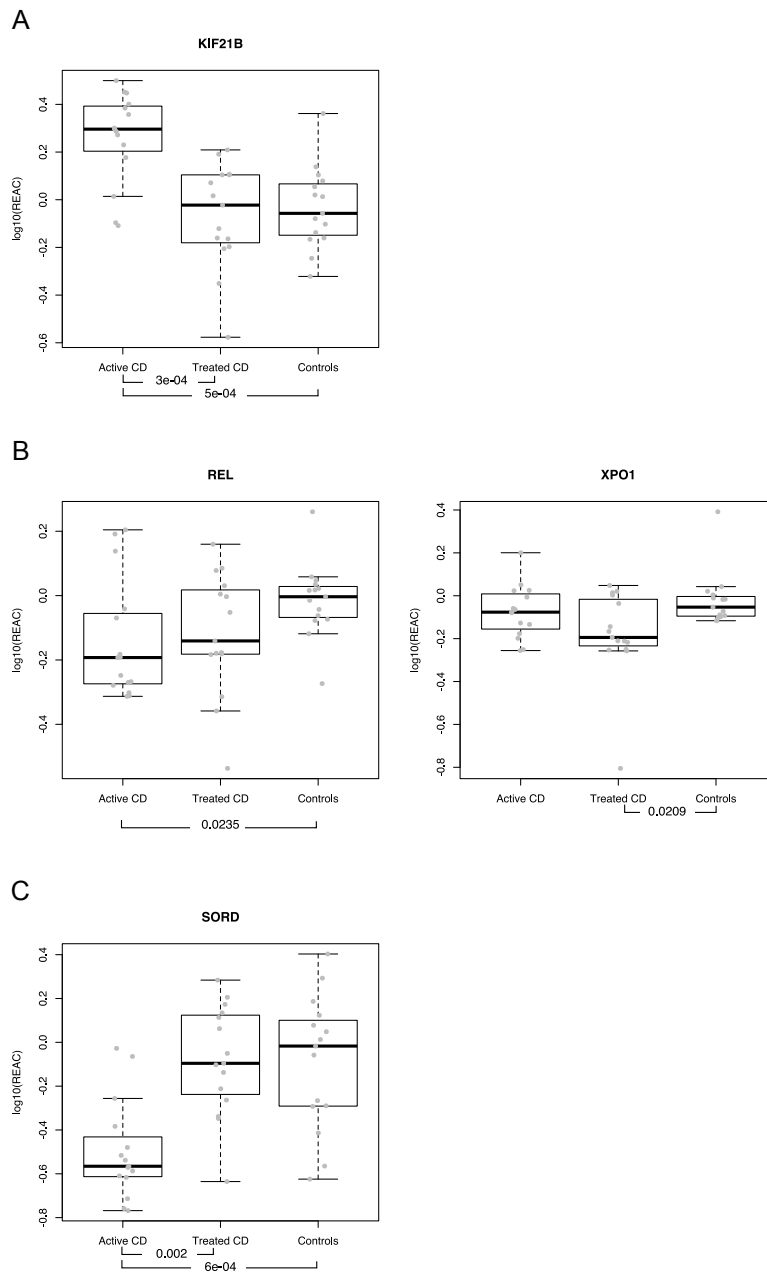

**Figure S8:** Expression analysis of the rest of analyzed genes. REAC, relative expression to average of controls; below each gene the significance of Mann-Whitney test for each comparison. A, analyzed gene from chr1:200899734-201054931; B, analyzed genes from chr2:60731152-61660852; C, analyzed gene with a solitary SNP.

**Table S1:** Number of individuals in each immunogroup.

| <b>IG</b> | <b>Total</b> | <b>Cases</b> | <b>Controls</b> |
|-----------|--------------|--------------|-----------------|
| 1         | 480          | 125          | 355             |
| 2         | 302          | 85           | 217             |
| 3         | 299          | 109          | 190             |
| 4         | 290          | 58           | 232             |
| 5         | 263          | 82           | 181             |
| 6         | 115          | 29           | 86              |
| 7         | 377          | 99           | 278             |
| 8         | 2091         | 1230         | 861             |
| 9         | 43           | 9            | 34              |
| 10        | 1203         | 885          | 318             |
| 11        | 763          | 478          | 285             |
| 12        | 1231         | 587          | 644             |
| 13        | 1431         | 329          | 1102            |
| 14        | 1383         | 434          | 949             |
| 15        | 1764         | 1256         | 508             |
| 16        | 489          | 151          | 338             |
| 17        | 548          | 181          | 367             |
| 18        | 242          | 174          | 68              |
| 19        | 81           | 51           | 30              |
| 20        | 207          | 46           | 161             |
| 21        | 236          | 76           | 160             |
| 22        | 1075         | 217          | 858             |
| 23        | 4178         | 3031         | 1147            |
| 24        | 1074         | 425          | 649             |
| 25        | 621          | 230          | 391             |
| 26        | 1335         | 1003         | 332             |
| 27        | 19           | 14           | 5               |
| 28        | 1054         | 329          | 725             |
| 29        | 19           | 16           | 3               |
| 30        | 1056         | 302          | 754             |

**Table S2:** Summary of significant SNPs located outside relevant regions.<sup>a</sup>In the case of solitary SNPs, SNPs located 100 kilobases around.

| Region (hg38)            | previously reported region (hg38) | Number of significant new SNPs | Number of SNPs in the region | Top SNP ( <i>p-value</i> ; <i>odds-ratio</i> )              | Novel candidate genes                 |
|--------------------------|-----------------------------------|--------------------------------|------------------------------|-------------------------------------------------------------|---------------------------------------|
| chr1:1199862             | -                                 | 1                              | 14 <sup>a</sup>              | rs9729550:A>C; hg38 chr1:g.1199862A>C (5.714e-07; 0.8922)   | -                                     |
| chr1:2553995-2642288     | chr1:24963243-24978061            | 9                              | 113                          | rs4310388:G>T; hg38 chr1:g.2575976G>T (6.015e-08; 0.8934)   | <i>TNFRSF14</i> ,<br><i>LOC115110</i> |
| chr1:12173697            | -                                 | 1                              | 4 <sup>a</sup>               | rs976881:A>G; hg38 chr1:g.12173697T>C (1.934e-07; 0.8945)   | <i>TNFRSF1B</i>                       |
| chr1:167451188           | -                                 | 1                              | 7 <sup>a</sup>               | rs2056626:G>T; hg38 chr1:g.167451188T>G (2.321e-07; 0.9004) | <i>CD247</i>                          |
| chr1:172718118-172890052 | chr1:172704443-172895512          | 24                             | 185                          | rs2639624:A>G; hg38 chr1:g.172792701G>A (6.033e-10; 1.14)   | -                                     |
| chr2:62254323-62309536   | -                                 | 9                              | 124                          | rs3924500:C>T; hg38 chr2:g.62305910G>A (4.3e-09; 1.2)       | -                                     |
| chr2:100240555           | -                                 | 1                              | 595 <sup>a</sup>             | rs12474386:A>G; hg38 chr2:g.100240555G>A (4.418e-07; 1.107) | <i>LINC01104</i>                      |
| chr2:102308763-102489875 | chr2: 102291655-102476622         | 79                             | 514                          | rs4851011:C>T; hg38 chr2:g.102473219C>T (5.07e-09; 0.8777)  | -                                     |
| chr2:181256403           | chr2:183472533-183567488          | 1                              | 359 <sup>a</sup>             | rs1371617:C>T; hg38 chr2:g.181256403A>G (3.185e-07; 0.8979) | -                                     |
| chr2:191073874           | chr2:191048308-191070307          | 1                              | 272 <sup>a</sup>             | rs7594501:A>G; hg38 chr2:g.191073874G>A (4.674e-07; 0.8289) | -                                     |
| chr2:203750149-203937382 | chr2:203545673-203995238          | 11                             | 359                          | rs73055463:G>T; hg38 chr2:g.203848084T>G (1.792e-07; 1.246) | -                                     |
| chr3:32977882            | -                                 | 1                              | 113 <sup>a</sup>             | rs6764245:A>G; hg38 chr3:g.32977882G>A (2.986e-07; 1.116)   | -                                     |



| Region (hg38)                   | previously reported region (hg38) | Number of significant new SNPs | Number of SNPs in the region | Top SNP ( <i>p</i> -value; odds-ratio)                        | Novel candidate genes |
|---------------------------------|-----------------------------------|--------------------------------|------------------------------|---------------------------------------------------------------|-----------------------|
| <b>chr3:45902103-46604535</b>   | chr3:46442139-46463825            | 20                             | 1304                         | rs7623238:A>G; hg38 chr3:g.46418860G>A (3.457e-08; 1.169)     | -                     |
| <b>chr3:69203748</b>            | -                                 | 1                              | 5 <sup>a</sup>               | rs6806528:C>T; hg38 chr3:g.69203748C>T (3.84e-07; 1.184)      | <i>FRMD4B</i>         |
| <b>chr3:159907756-159911578</b> | chr3:159849517-160049519          | 2                              | 10                           | rs9873580:C>T; hg38 chr3:g.159911578C>T (5.6e-08; 0.8412)     | -                     |
| <b>chr3:188415798</b>           | -                                 | 1                              | 144 <sup>a</sup>             | rs116392971:C>T; hg38 chr3:g.188415798T>C (2.357e-07; 0.7522) | -                     |
| <b>chr4:26909378</b>            | -                                 | 1                              | 2 <sup>a</sup>               | rs12642608:C>T; hg38 chr4:g.26909378T>C (4.767e-07; 0.9032)   | <i>STIM2</i>          |
| <b>chr4:122053452</b>           | -                                 | 1                              | 52 <sup>a</sup>              | rs10516615:A>G; hg38 chr4:g.122053452A>G (6.326e-07; 0.8627)  | -                     |
| <b>chr4:122600025-122602201</b> | chr4:122128437-122629959          | 7                              | 14                           | rs6820791:C>T; hg38 chr4:g.122600628C>T (4.163e-08; 0.8945)   | -                     |
| <b>chr6:382559-421281</b>       | chr6:375000-455000                | 4                              | 91                           | rs7773324:A>G; hg38 chr4:g.382559G>A (1.989e-10; 1.139)       | -                     |
| <b>chr7:37360866-37362887</b>   | chr7:37360866-37398274            | 2                              | 4                            | rs111796602:C>T; hg38 chr7:g.37362887T>C (8.868e-08; 1.184)   | -                     |
| <b>chr7:74615423</b>            | -                                 | 1                              | 62                           | rs6460086:G>T; hg38 chr7:g.74615423T>G (1.857e-07; 1.186)     | -                     |
| <b>chr10:79941767</b>           | -                                 | 1                              | 5                            | rs911887:A>G; hg38 chr10:g.79941767T>C (1.915e-07; 0.9)       | <i>SFTPD</i>          |
| <b>chr10:102135182</b>          | -                                 | 1                              | 1 <sup>a</sup>               | rs4919611:A>C; hg38 chr10:g.102135182C>A (5.523e-07; 1.161)   | <i>PPRC1</i>          |
| <b>chr11: 61057137-61057550</b> | -                                 | 2                              | 3                            | rs175112:A>T; hg38 chr11:g.61057550A>T (3.907e-08; 1.123)     | -                     |

| Region (hg38)             | previously reported region (hg38) | Number of significant new SNPs | Number of SNPs in the region | Top SNP ( <i>p</i> -value; odds-ratio)                       | Novel candidate genes |
|---------------------------|-----------------------------------|--------------------------------|------------------------------|--------------------------------------------------------------|-----------------------|
| chr11:128507585-128549329 | -                                 | 4                              | 75                           | rs4396302:A>G; hg38 chr11:g.128549329G>A (3.67e-07; 0.902)   | -                     |
| chr15:46772530            | -                                 | 1                              | 2 <sup>a</sup>               | rs11637803:C>T; hg38 chr15:g.44852020T>C (2.94e-08; 1.492)   | -                     |
| chr15:46946227            | -                                 | 1                              | 2 <sup>a</sup>               | rs11636774:A>C; hg38 chr15:g.45025717A>C (8.634e-10; 1.416)  | <i>SORD</i>           |
| chr15: 74770056-74833304  | chr15:74318390-75191270           | 6                              | 11                           | rs1378942:G>T; hg38 chr15:g.74785026C>A (1.244e-10; 1.144)   | -                     |
| chr17:8144851             | -                                 | 1                              | 5 <sup>a</sup>               | rs2253820:A>G NC; hg38 chr17:g.8144851T>C (5.254e-07; 1.144) | -                     |
| chr21:42446949-42455624   | chr21:42389975-42467035           | 6                              | 26                           | rs9680344:A>G; hg38 chr21:g.42454314A>G (3.54e-10; 0.8796)   | -                     |

**Table S3:** relative expression values of analyzed genes. GFD: CD patient on gluten-free diet

| <i>Sample ID</i> | <i>disease status</i> | <i>ACMSD</i> | <i>CCNT2</i> | <i>DARS</i> | <i>KIF21B</i> | <i>LCT</i> | <i>MAP3K19</i> | <i>MCM6</i> | <i>R3HDM1</i> | <i>RAB3GAP1</i> | <i>REL</i> | <i>SORD</i> | <i>TMEM163</i> | <i>XPO1</i> | <i>ZRANB3</i> |
|------------------|-----------------------|--------------|--------------|-------------|---------------|------------|----------------|-------------|---------------|-----------------|------------|-------------|----------------|-------------|---------------|
| 23017            | Active                | 0.0991       | 0.5652       | 0.8222      | 3.1598        | 0.0754     | 0.0000         | 0.5856      | 0.5271        | 0.4724          | 0.5648     | 0.1706      | 0.4215         | 0.5609      | 0.9727        |
| 23014            | Active                | 0.2732       | 0.5972       | 0.5678      | 2.2777        | 0.1041     | 0.0000         | 0.6327      | 0.5444        | 0.5261          | 0.4880     | 0.1742      | 0.2953         | 0.6331      | 0.5886        |
| 24051            | Active                | 0.2734       | 0.7145       | 0.6968      | 2.5174        | 1.8507     | 0.0000         | 0.8737      | 0.7061        | 0.9003          | 0.8521     | 0.8622      | 0.3729         | 0.7348      | 0.7168        |
| 26047            | Active                | 1.0893       | 0.5633       | 0.7791      | 2.4231        | 0.2934     | 0.0000         | 1.0516      | 0.6531        | 0.7800          | 0.5404     | 0.2897      | 1.0426         | 0.8728      | 1.0372        |
| 25016            | Active                | 0.8148       | 1.0581       | 1.2466      | 2.8033        | 1.3848     | 0.0000         | 1.3639      | 0.9724        | 1.4051          | 1.5538     | 0.5545      | 3.1556         | 0.8330      | 1.4842        |
| 25022            | Active                | 0.0000       | 0.8043       | 1.1126      | 2.8295        | 1.0345     | 0.0000         | 1.5927      | 0.5977        | 1.8580          | 1.6010     | 0.9385      | 0.1490         | 1.0561      | 2.8016        |
| 23040            | Active                | 0.1073       | 0.4429       | 0.6419      | 1.6985        | 0.1975     | 0.0000         | 0.6184      | 0.6323        | 0.5604          | 0.6419     | 0.3047      | 1.6641         | 0.6653      | 0.7497        |
| 23057            | Active                | 0.2358       | 0.6303       | 0.7679      | 1.9356        | 0.0723     | 0.0000         | 0.7408      | 0.8117        | 0.6392          | 0.9094     | 0.2590      | 0.2603         | 1.5869      | 1.1281        |
| 23068            | Active                | 0.0833       | 0.6224       | 0.6431      | 1.9773        | 0.1754     | 0.0000         | 0.6684      | 0.6265        | 0.5928          | 0.4992     | 0.2419      | 0.1635         | 0.8385      | 1.0591        |
| 27050            | Active                | 0.2065       | 0.5094       | 0.7625      | 0.8013        | 0.1072     | 0.0000         | 0.8968      | 0.5927        | 0.5777          | 0.4864     | 0.2719      | 0.5759         | 0.7463      | 1.4217        |
| 27056            | Active                | 2.1643       | 0.6576       | 0.9096      | 1.0328        | 0.1924     | 0.0000         | 1.2252      | 0.6160        | 0.6938          | 0.5375     | 0.2456      | 3.5159         | 0.8627      | 1.1228        |
| 28049            | Active                | 4.9842       | 0.9305       | 1.2373      | 1.8705        | 0.1368     | 0.0000         | 1.1124      | 0.8932        | 0.8061          | 0.6434     | 0.2687      | 9.5762         | 0.9853      | 1.2417        |
| 25061            | Active                | 2.2063       | 0.7533       | 1.0773      | 1.9974        | 0.2686     | 0.0000         | 1.4673      | 0.7862        | 1.1979          | 0.6571     | 0.4135      | 2.0246         | 1.1243      | 1.1977        |
| 25037            | Active                | 0.7477       | 0.4672       | 0.9152      | 0.7787        | 0.0558     | 0.0000         | 0.9171      | 0.5854        | 0.5296          | 0.5265     | 0.1934      | 0.4224         | 0.5551      | 0.1948        |
| 24052            | Active                | 4.3109       | 0.7921       | 1.3068      | 1.5030        | 0.0283     | 0.0000         | 1.2743      | 0.6505        | 1.7905          | 1.3744     | 0.3313      | 0.5797         | 1.0602      | 1.9095        |
| 25052            | GFD                   | 0.0000       | 0.5295       | 0.5957      | 1.2715        | 1.4060     | 0.0000         | 0.7859      | 0.5002        | 0.6829          | 0.4851     | 1.1549      | 0.0245         | 0.5621      | 0.7374        |
| 25040            | GFD                   | 0.9015       | 1.0661       | 0.9770      | 1.2790        | 2.1547     | 0.0000         | 1.6599      | 0.9302        | 1.3543          | 1.2165     | 0.8021      | 0.4477         | 0.9203      | 1.2940        |
| 27031            | GFD                   | 0.4481       | 0.1574       | 0.1438      | 0.9494        | 0.0259     | 0.0000         | 0.6014      | 0.5385        | 0.2783          | 0.2905     | 0.4589      | 1.3112         | 0.1566      | 0.6844        |
| 28050            | GFD                   | 2.2294       | 0.6907       | 0.7024      | 1.0389        | 0.4143     | 0.0000         | 0.6990      | 0.5154        | 0.6532          | 0.7231     | 0.2315      | 3.4396         | 1.1166      | 0.4411        |

| <b>Sample ID</b> | <b>disease status</b> | <b>ACMSD</b> | <b>CCNT2</b> | <b>DARS</b> | <b>KIF21B</b> | <b>LCT</b> | <b>MAP3K19</b> | <b>MCM6</b> | <b>R3HDM1</b> | <b>RAB3GAP1</b> | <b>REL</b> | <b>SORD</b> | <b>TMEM163</b> | <b>XPO1</b> | <b>ZRANB3</b> |
|------------------|-----------------------|--------------|--------------|-------------|---------------|------------|----------------|-------------|---------------|-----------------|------------|-------------|----------------|-------------|---------------|
| 27005            | GFD                   | 0.0000       | 0.5737       | 0.7573      | 1.6180        | 2.4582     | 0.0000         | 0.8157      | 0.6770        | 1.0006          | 0.8867     | 1.9230      | 0.4293         | 0.7181      | 0.6385        |
| 27023            | GFD                   | 0.0000       | 0.3449       | 0.7234      | 0.6233        | 0.1364     | 0.0000         | 0.3460      | 0.3076        | 0.4205          | 0.4381     | 0.7290      | 0.0000         | 0.6062      | 0.5875        |
| 25080            | GFD                   | 0.0000       | 0.3582       | 0.6434      | 0.6856        | 0.4684     | 0.0000         | 0.8506      | 0.5799        | 0.7059          | 0.6618     | 0.5450      | 0.3675         | 0.5582      | 0.6220        |
| 25085            | GFD                   | 0.0000       | 0.8782       | 1.1916      | 1.5529        | 1.7141     | 0.0000         | 1.0531      | 0.7110        | 1.4145          | 1.4444     | 1.6049      | 0.0000         | 1.0334      | 0.2074        |
| 25087            | GFD                   | 0.0000       | 0.9967       | 0.9367      | 1.2715        | 1.9299     | 0.0000         | 1.2979      | 0.8247        | 1.5733          | 1.0736     | 1.2985      | 0.5077         | 1.0489      | 0.9491        |
| 29091            | GFD                   | 0.3509       | 0.9313       | 0.9037      | 0.6351        | 1.0539     | 0.0000         | 1.0161      | 1.0343        | 0.9774          | 0.9928     | 1.4899      | 0.9155         | 1.0070      | 1.0508        |
| 29109            | GFD                   | 0.0212       | 0.5587       | 0.7156      | 0.2650        | 1.3962     | 0.0000         | 0.9217      | 0.5886        | 0.6723          | 0.6595     | 1.3628      | 0.0000         | 0.6816      | 0.6128        |
| 210051           | GFD                   | 3.0543       | 1.0005       | 0.9696      | 0.7566        | 2.0244     | 0.0000         | 0.9589      | 0.6534        | 0.9547          | 1.1966     | 0.7896      | 3.4672         | 0.6145      | 0.4519        |
| 27057            | GFD                   | 0.8297       | 0.8041       | 0.7121      | 0.4454        | 0.3850     | 0.0000         | 0.7193      | 0.4923        | 0.5959          | 0.6558     | 0.8901      | 1.4997         | 0.6390      | 0.8074        |
| 27035            | GFD                   | 0.0000       | 0.5147       | 0.7963      | 1.1776        | 0.2917     | 0.0000         | 0.4630      | 0.6258        | 0.6722          | 0.6651     | 0.6139      | 0.9432         | 0.5530      | 0.5718        |
| 26060            | GFD                   | 1.8542       | 0.6418       | 0.8445      | 0.6907        | 0.1087     | 0.0000         | 0.7710      | 0.7077        | 0.9012          | 1.0105     | 0.4491      | 0.2636         | 0.6164      | 0.6757        |
| 24012            | Control               | 2.8736       | 0.8746       | 0.9601      | 0.5678        | 0.5587     | 0.0000         | 0.6752      | 0.8696        | 0.8146          | 0.8365     | 0.5099      | 0.3996         | 0.7981      | 0.8860        |
| 21013            | Control               | 0.0000       | 2.3894       | 2.0341      | 2.2992        | 2.9244     | 0.0000         | 1.8773      | 2.6514        | 2.8176          | 1.8221     | 1.1179      | 0.0000         | 2.4646      | 2.2849        |
| 29129            | Control               | 0.7211       | 0.9323       | 0.9418      | 0.4767        | 1.2821     | 0.0000         | 1.3069      | 0.7715        | 1.0189          | 0.8667     | 0.5419      | 1.1758         | 0.9636      | 1.5278        |
| 210006           | Control               | 0.0000       | 1.0217       | 1.1313      | 0.8768        | 0.3105     | 0.0000         | 1.1140      | 1.0160        | 0.8594          | 1.0828     | 0.2724      | 0.3231         | 0.8849      | 0.8020        |
| 210007           | Control               | 0.4959       | 0.7272       | 0.7967      | 1.3738        | 1.0132     | 0.0000         | 0.9898      | 0.6151        | 0.5588          | 0.5329     | 0.2375      | 1.2875         | 0.7921      | 0.4118        |
| 210008           | Control               | 0.7840       | 0.9172       | 1.0092      | 1.1328        | 1.3483     | 0.0000         | 1.4125      | 0.7386        | 0.9965          | 0.8441     | 1.0304      | 1.0667         | 0.9600      | 0.9397        |
| 211073           | Control               | 0.0000       | 0.8917       | 0.7743      | 0.7899        | 1.9779     | 0.0000         | 1.3270      | 0.8895        | 0.7582          | 1.0375     | 1.3283      | 0.1953         | 0.7648      | 0.6993        |
| 211074           | Control               | 3.0264       | 0.7758       | 1.0813      | 1.0472        | 0.3936     | 0.0000         | 0.7700      | 0.9813        | 0.8684          | 1.1145     | 0.8744      | 2.6105         | 0.9755      | 1.1250        |
| 211075           | Control               | 0.0000       | 0.8303       | 0.9458      | 1.2704        | 0.1928     | 0.0000         | 0.6244      | 1.0201        | 0.7813          | 1.0524     | 1.1961      | 1.6100         | 1.0492      | 0.6916        |

| <b>Sample ID</b> | <b>disease status</b> | <b>ACMSD</b> | <b>CCNT2</b> | <b>DARS</b> | <b>KIF21B</b> | <b>LCT</b> | <b>MAP3K19</b> | <b>MCM6</b> | <b>R3HDM1</b> | <b>RAB3GAP1</b> | <b>REL</b> | <b>SORD</b> | <b>TMEM163</b> | <b>XPO1</b> | <b>ZRANB3</b> |
|------------------|-----------------------|--------------|--------------|-------------|---------------|------------|----------------|-------------|---------------|-----------------|------------|-------------|----------------|-------------|---------------|
| 211078           | Control               | 0.2106       | 0.9720       | 0.8886      | 0.6824        | 0.8971     | 0.0000         | 0.9530      | 1.0210        | 0.9057          | 0.9668     | 0.5132      | 0.2212         | 0.8141      | 0.9579        |
| 211084           | Control               | 0.0838       | 0.8855       | 0.8687      | 0.8329        | 0.5072     | 0.0000         | 0.6632      | 0.8315        | 1.1664          | 0.7611     | 2.5304      | 0.1626         | 0.7658      | 1.1129        |
| 211090           | Control               | 0.1637       | 0.8619       | 0.7906      | 0.7285        | 1.8327     | 0.0000         | 0.7948      | 0.8928        | 0.8925          | 0.9059     | 0.9616      | 0.8636         | 0.8084      | 0.8802        |
| 211091           | Control               | 0.2221       | 1.1078       | 1.0998      | 1.0307        | 0.2060     | 0.0000         | 0.7616      | 1.0960        | 1.0841          | 1.1438     | 1.9629      | 0.8843         | 1.1032      | 0.9007        |
| 211096           | Control               | 0.4612       | 0.7939       | 0.6803      | 1.1993        | 1.1296     | 0.0000         | 0.8265      | 0.6846        | 0.6497          | 1.0408     | 1.5376      | 0.6369         | 1.0094      | 0.9947        |
| 211101           | Control               | 1.9575       | 1.0187       | 0.9973      | 0.6915        | 0.4260     | 0.0000         | 0.9040      | 0.9210        | 0.8281          | 0.9920     | 0.3855      | 2.5627         | 0.8462      | 0.7855        |
